# Supplementary material
Source: PubMed Central journal article supplement (PMC6645081)
Supplement: ao7b01539_si_001.pdf [file ao7b01539_si_001.pdf]

**Supporting information for:**

## **An electrochemical method to prepare graphene quantum dots and graphene oxide quantum dots**

Satyaprakash Ahirwar, Sudhanshu Mallick and Dharendra Bahadur\*

AUTHOR ADDRESS: Department of Metallurgical Engineering and Materials Science, Indian Institute of Technology Bombay, Mumbai, 400076, India

AUTHOR INFORMATION: Satyaprakash Ahirwar - satya.rhythm@iitb.ac.in, Sudhanshu Mallick - mallick@iitb.ac.in and Dharendra Bahadur - dhiren@iitb.ac.in.

### **Tables**

#### **List of Tables**

**Table S1.** Average size, lattice spacing, and size distribution range of GQD1–GQD4

**Table S2.** Raman D band, G band and  $I_D/I_G$  values for GQD1–GQD4

**Table S3.** PL behavior, excitation and emission wavelength peaks for GQD1–GQD4

**Table S1.** Average size, lattice spacing, and size distribution range of GQD1–GQD4

|                             | <b>GQD1</b> | <b>GQD2</b> | <b>GQD3</b> | <b>GQD4</b> |
|-----------------------------|-------------|-------------|-------------|-------------|
| <b>Avg. size (nm)</b>       | 2.5         | 3.04        | 2.24        | 2.65        |
| <b>lattice spacing (nm)</b> | 0.20        | 0.21        | 0.21        | 0.21        |
| <b>Size range (nm)</b>      | 2–3         | 1.5–4.5     | 2–3         | 1.5–4       |

**Table S2.** Raman D band, G band and  $I_D/I_G$  values for GQD1–GQD4

|                                 | <b>GQD1</b> | <b>GQD2</b> | <b>GQD3</b> | <b>GQD4</b> |
|---------------------------------|-------------|-------------|-------------|-------------|
| <b>D band (cm<sup>-1</sup>)</b> | 1338        | 1350        | 1348        | 1345        |
| <b>G band (cm<sup>-1</sup>)</b> | 1598        | 1587        | 1585        | 1590        |
| <b><math>I_D/I_G</math></b>     | 1.37        | 1.02        | 1.03        | 1.31        |

**Table S3.** PL behavior, excitation and emission wavelength peaks for GQD1–GQD4

|                           | <b>GQD1</b> | <b>GQD2</b> | <b>GQD3</b> | <b>GQD4</b> |
|---------------------------|-------------|-------------|-------------|-------------|
| <b>PL Excitation (nm)</b> | 354         | 343         | 359         | 403         |
| <b>PL Emission (nm)</b>   | 454, 535    | 448, 527    | 448         | 480, 538    |
